# Supplementary material for: Lipidomic Analysis of Liver Lipid Droplets after Chronic Alcohol Consumption with and without Betaine Supplementation
Source: MDPI journal article supplement (doi:10.3390/biology12030462), 2023-03-16
Supplement: s1 [file s1]

Supplementary Material

# Lipidomic analysis of Liver Lipid Droplets after Chronic Alcohol Consumption with and without Betaine Supplementation

Madan Kumar Arumugam <sup>1,2,3</sup> Sathish Kumar Perumal <sup>1,2</sup> Karuna Rasineni <sup>1,2</sup> Terrence M. Donohue Jr. <sup>1,2,4</sup> Natalia A. Osna <sup>1,2</sup> and Kusum K. Kharbanda <sup>1,2,4,\*</sup>

## Supplementary Tables

**Table S1.** The differences in the phosphatidylinositol (PI) lipidome of LD1 isolated from the livers of rats fed control (C), ethanol (E) or betaine-supplemented ethanol (EB) diet.

| Lipid Species | C vs E           |          | E vs EB      |          | C vs EB          |          |
|---------------|------------------|----------|--------------|----------|------------------|----------|
|               | Fold change<br>↑ | p-value  | Fold change↓ | p-value  | Fold change<br>↑ | p-value  |
| PI(34:3)      | 3.6              | 0.003376 | 1.6          | 0.0327   | 2.2              | 0.075    |
| PI(34:2)      | 3.4              | 0.000773 | 1.9          | 0.0034   | 1.8              | 0.088    |
| PI(34:1)      | 3.0              | 0.000214 | 1.3          | 0.021456 | 2.2              | 0.003109 |
| PI(36:6)      | 3.7              | 0.015325 | 2.2          | 0.060907 | 1.7              | 0.18477  |
| PI(36:5)      | 3.1              | 0.000876 | 2.3          | 0.004074 | 1.3              | 0.313934 |
| PI(36:4)      | 4.1              | 0.00028  | 2.8          | 0.000651 | 1.5              | 0.246736 |
| PI(36:3)      | 4.9              | 0.000915 | 2.6          | 0.004527 | 1.9              | 0.111229 |
| PI(36:2)      | 4.8              | 0.000668 | 1.9          | 0.009038 | 2.6              | 0.007531 |
| PI(36:1)      | 3.4              | 0.000842 | 1.5          | 0.03806  | 2.3              | 0.014817 |
| PI(38:6)      | 6.7              | 0.003004 | 2.3          | 0.038894 | 3.0              | 0.069835 |
| PI(38:5)      | 5.1              | 0.003438 | 1.5          | 0.136593 | 3.4              | 0.05665  |
| PI(38:4)      | 4.0              | 0.010103 | 1.4          | 0.221509 | 2.9              | 0.047197 |
| PI(38:3)      | 3.9              | 0.016944 | 1.2          | 0.341466 | 3.4              | 0.001943 |
| PI(38:2)      | 2.7              | 0.022299 | 0.7          | 0.092458 | 3.7              | 2.48E-05 |
| PI(38:1)      | 4.4              | 0.10391  | 0.8          | 0.359323 | 5.5              | 0.003894 |
| PI(40:8)      | 4.0              | 0.001911 | 1.2          | 0.097239 | 3.2              | 0.001665 |
| PI(40:7)      | 7.9              | 0.008544 | 0.5          | 0.10375  | 16.1             | 0.01588  |
| PI(40:6)      | 3.6              | 0.018457 | 0.5          | 0.115726 | 6.8              | 0.021355 |
| PI(40:5)      | 4.8              | 0.019778 | 1.3          | 0.288662 | 3.6              | 0.010745 |
| PI(40:4)      | 1.0              | 0.493    | 0.3          | 0.000    | 3.2              | 0.010    |

**Table S2.** The differences in the phosphatidylserine (PS) lipidome of LD1 isolated from the livers of rats fed control (C), ethanol (E) or betaine-supplemented ethanol (EB) diet.

| Lipid Species | C vs E        |         | E vs EB      |         | C vs EB       |         |
|---------------|---------------|---------|--------------|---------|---------------|---------|
|               | Fold change ↑ | p-value | Fold change↓ | p-value | Fold change ↑ | p-value |
| PS(32:1)      | 8.8           | 0.026   | 2.1          | 0.095   | 4.2           | 0.095   |
| PS(32:0)      | 11.7          | 0.025   | 3.0          | 0.078   | 4.0           | 0.078   |
| PS(34:4)      | 6.3           | 0.015   | 1.1          | 0.047   | 5.8           | 0.047   |
| PS(34:3)      | 3.5           | 0.015   | 0.7          | 0.032   | 5.0           | 0.032   |
| PS(34:2)      | 8.8           | 0.007   | 1.8          | 0.035   | 5.0           | 0.035   |
| PS(34:1)      | 5.2           | 0.001   | 1.0          | 0.033   | 5.2           | 0.033   |
| PS(36:5)      | 6.4           | 0.045   | 8.0          | 0.384   | 0.8           | 0.384   |
| PS(36:4)      | 9.5           | 0.001   | 1.9          | 0.011   | 4.9           | 0.011   |
| PS(36:3)      | 9.6           | 0.001   | 2.8          | 0.020   | 3.5           | 0.020   |
| PS(36:2)      | 9.5           | 0.003   | 2.4          | 0.050   | 4.0           | 0.050   |
| PS(36:1)      | 10.8          | 0.007   | 2.7          | 0.010   | 4.1           | 0.010   |
| PS(38:7)      | 16.5          | 0.038   | 11.4         | 0.274   | 1.4           | 0.274   |

|           |      |       |      |       |      |       |
|-----------|------|-------|------|-------|------|-------|
| PS(38:5)  | 20.9 | 0.009 | 3.0  | 0.016 | 6.9  | 0.016 |
| PS(38:4)  | 13.2 | 0.020 | 8.2  | 0.313 | 1.6  | 0.313 |
| PS(38:3)  | 18.4 | 0.068 | 1.6  | 0.001 | 11.3 | 0.001 |
| PS(38:2)  | 10.3 | 0.030 | 3.2  | 0.072 | 3.3  | 0.072 |
| PS(38:1)  | 12.6 | 0.040 | 3.4  | 0.095 | 3.7  | 0.095 |
| PS(38:0)  | 9.9  | 0.082 | 3.2  | 0.002 | 3.1  | 0.002 |
| PS(40:8)  | 7.8  | 0.001 | 3.8  | 0.194 | 2.1  | 0.194 |
| PS(40:7)  | 13.1 | 0.002 | 4.5  | 0.095 | 2.9  | 0.095 |
| PS(40:6)  | 21.4 | 0.015 | 8.7  | 0.199 | 2.4  | 0.199 |
| PS(40:5)  | 20.0 | 0.003 | 7.7  | 0.226 | 2.6  | 0.226 |
| PS(40:3)  | 5.2  | 0.046 | 0.7  | 0.068 | 6.9  | 0.068 |
| PS(40:2)  | 14.1 | 0.016 | 1.9  | 0.016 | 7.5  | 0.016 |
| PS(40:1)  | 7.2  | 0.023 | 1.9  | 0.021 | 3.8  | 0.021 |
| PS(42:11) | 8.3  | 0.048 | 1.9  | 0.049 | 4.4  | 0.049 |
| PS(42:9)  | 11.6 | 0.007 | 4.8  | 0.031 | 2.4  | 0.031 |
| PS(42:8)  | 5.5  | 0.011 | 1.8  | 0.011 | 3.1  | 0.011 |
| PS(42:7)  | 41.8 | 0.000 | 13.7 | 0.103 | 3.0  | 0.103 |
| PS(42:6)  | 23.0 | 0.030 | 2.5  | 0.008 | 9.4  | 0.008 |
| PS(42:5)  | 15.1 | 0.074 | 2.1  | 0.031 | 7.3  | 0.031 |
| PS(44:12) | 13.3 | 0.024 | 2.9  | 0.005 | 4.6  | 0.005 |
| PS(44:10) | 10.1 | 0.001 | 5.3  | 0.208 | 1.9  | 0.208 |
| PS(44:8)  | 17.2 | 0.019 | 8.5  | 0.112 | 2.0  | 0.112 |
| PS(44:7)  | 6.2  | 0.104 | 1.0  | 0.042 | 6.4  | 0.042 |
| PS(44:5)  | 11.7 | 0.012 | 5.0  | 0.180 | 2.3  | 0.180 |
| PS(44:4)  | 16.1 | 0.005 | 4.5  | 0.023 | 3.6  | 0.023 |
| PS(44:3)  | 16.3 | 0.001 | 6.0  | 0.083 | 2.7  | 0.083 |
| PS(44:2)  | 14.3 | 0.000 | 4.7  | 0.056 | 3.1  | 0.056 |

**Table S3.** The differences in the hexosylceramide (HexCer), cholesteryl esters (CE) and diacylglycerol (DAG) lipidome of LD1 isolated from the livers of rats fed control (C), ethanol (E) or betaine-supplemented ethanol (EB) diet.

| Lipid Species      | C vs E           |          | E vs EB      |          | C vs EB          |          |
|--------------------|------------------|----------|--------------|----------|------------------|----------|
|                    | Fold change<br>↑ | p-value  | Fold change↓ | p-value  | Fold change<br>↑ | p-value  |
| HexCer-d18:1(20:0) | 18.8             | 0.009236 | 5.1          | 0.0387   | 3.7              | 0.193    |
| HexCer-d18:1(22:0) | 15.0             | 0.001285 | 2.7          | 0.0224   | 5.5              | 0.034    |
| CE(16:1)           | 12.4             | 0.015188 | 3.1          | 0.08527  | 4.0              | 0.039028 |
| CE(16:0)           | 11.5             | 0.003855 | 3.8          | 0.023738 | 3.0              | 0.054119 |
| CE(18:3)           | 13.8             | 0.004568 | 5.2          | 0.01803  | 2.6              | 0.093026 |
| CE(18:2)           | 13.4             | 0.006543 | 5.9          | 0.025298 | 2.3              | 0.138044 |
| CE(18:1)           | 14.5             | 0.005609 | 4.2          | 0.025987 | 3.4              | 0.035101 |
| CE(18:0)           | 22.0             | 0.020207 | 4.0          | 0.06677  | 5.5              | 0.01337  |
| CE(20:5)           | 7.5              | 0.001717 | 3.8          | 0.010198 | 2.0              | 0.195234 |
| CE(20:4)           | 7.5              | 0.001717 | 3.8          | 0.010198 | 2.0              | 0.195235 |
| CE(20:3)           | 14.8             | 0.005519 | 4.8          | 0.022255 | 3.1              | 0.070039 |
| CE(22:6)           | 8.6              | 0.013031 | 3.6          | 0.032206 | 2.4              | 0.054285 |
| DAG(16:0/16:1)     | 6.1              | 0.002937 | 0.9          | 0.432243 | 6.5              | 0.033    |
| DAG(16:0/16:0)     | 8.0              | 0.000188 | 1.2          | 0.295031 | 6.5              | 0.033675 |
| DAG(18:3/16:0)     | 12.0             | 0.000746 | 1.4          | 0.185356 | 8.4              | 0.040149 |
| DAG(18:2/16:1)     | 23.6             | 0.000804 | 2.3          | 0.034355 | 10.3             | 0.03087  |
| DAG(18:2/16:0)     | 13.9             | 0.000225 | 2.3          | 0.02018  | 6.0              | 0.038491 |
| DAG(18:1/16:1)     | 22.5             | 0.000607 | 1.7          | 0.075445 | 13.6             | 0.009378 |
| DAG(18:1/16:0)     | 12.7             | 0.000347 | 1.6          | 0.088075 | 8.1              | 0.015066 |
| DAG(18:3/18:2)     | 16.5             | 0.005    | 3.5          | 0.031    | 4.7              | 0.050    |
| DAG(18:3/18:1)     | 17.8             | 0.001    | 3.1          | 0.016    | 5.8              | 0.068    |
| DAG(18:2/18:2)     | 19.8             | 0.010    | 5.5          | 0.035    | 3.6              | 0.082    |
| DAG(16:0/20:4)     | 12.3             | 0.000    | 1.6          | 0.120    | 7.6              | 0.054    |

|                |      |          |     |          |      |          |
|----------------|------|----------|-----|----------|------|----------|
| DAG(18:2/18:1) | 19.7 | 0.004    | 3.4 | 0.030    | 5.7  | 0.047    |
| DAG(16:0/20:3) | 17.6 | 0.001    | 1.7 | 0.111    | 10.6 | 0.029    |
| DAG(16:1/20:2) | 20.2 | 0.029    | 4.1 | 0.090    | 4.9  | 0.012    |
| DAG(18:2/18:0) | 21.9 | 0.002    | 2.8 | 0.022    | 7.9  | 0.037    |
| DAG(18:1/18:1) | 16.1 | 0.002    | 2.2 | 0.045    | 7.4  | 0.020    |
| DAG(18:1/18:0) | 14.8 | 0.002    | 1.7 | 0.105    | 8.9  | 0.019    |
| DAG(18:2/20:4) | 20.2 | 0.001    | 2.5 | 0.028    | 8.0  | 0.067    |
| DAG(16:0/22:6) | 16.4 | 0.001    | 1.5 | 0.159    | 10.8 | 0.041    |
| DAG(18:1/20:4) | 18.6 | 0.000    | 2.2 | 0.047    | 8.5  | 0.066    |
| DAG(18:2/20:3) | 22.8 | 0.002    | 2.1 | 0.070    | 11.0 | 0.032    |
| DAG(18:1/20:3) | 11.7 | 0.001    | 1.0 | 0.482    | 12.0 | 0.060    |
| DAG(16:0/22:4) | 23.0 | 0.005    | 2.1 | 0.091    | 10.8 | 0.030    |
| DAG(18:0/20:3) | 23.4 | 0.001    | 1.9 | 0.098    | 12.1 | 0.070    |
| DAG(18:1/20:2) | 14.4 | 0.018    | 2.0 | 0.130    | 7.0  | 0.011    |
| DAG(18:1/22:6) | 27.0 | 0.000    | 2.7 | 0.015    | 9.9  | 0.047    |
| DAG(18:2/22:5) | 16.4 | 0.003    | 2.3 | 0.027    | 7.2  | 0.005    |
| DAG(18:0/22:6) | 30.3 | 0.001    | 1.9 | 0.104    | 15.8 | 0.064    |
| DAG(18:1/22:5) | 14.3 | 0.00205  | 1.9 | 0.114487 | 7.6  | 0.068519 |
| DAG(18:2/22:4) | 17.2 | 0.012797 | 1.0 | 0.492982 | 16.9 | 0.082295 |
| DAG(18:1/22:4) | 21.7 | 0.002175 | 2.1 | 0.079474 | 10.4 | 0.053206 |

**Table S4.** The differences in the triacylglycerol (TAG) lipidome of LD1 isolated from the livers of rats fed control (C), ethanol (E) or betaine-supplemented ethanol (EB) diet.

| Lipid Species | C vs E        |         | E vs EB       |         | C vs EB       |         |
|---------------|---------------|---------|---------------|---------|---------------|---------|
|               | Fold change ↑ | p-value | Fold change ↓ | p-value | Fold change ↑ | p-value |
| TAG(48:0)     | 4.1           | 0.006   | 1.0           | 0.443   | 3.9           | 0.004   |
| TAG(50:3)     | 9.6           | 0.004   | 1.2           | 0.358   | 8.2           | 0.027   |
| TAG(50:2)     | 24.8          | 0.013   | 1.4           | 0.301   | 17.5          | 0.080   |
| TAG(50:1)     | 14.3          | 0.010   | 1.8           | 0.141   | 7.8           | 0.052   |
| TAG(50:0)     | 15.2          | 0.007   | 1.9           | 0.119   | 8.0           | 0.049   |
| TAG(52:6)     | 15.7          | 0.002   | 1.8           | 0.106   | 8.8           | 0.043   |
| TAG(52:5)     | 15.8          | 0.004   | 1.8           | 0.119   | 9.0           | 0.037   |
| TAG(52:4)     | 34.1          | 0.001   | 1.9           | 0.067   | 18.1          | 0.028   |
| TAG(52:2)     | 27.3          | 0.008   | 2.4           | 0.077   | 11.4          | 0.040   |
| TAG(52:1)     | 19.6          | 0.013   | 1.6           | 0.219   | 12.2          | 0.049   |
| TAG(52:0)     | 19.1          | 0.005   | 1.5           | 0.221   | 12.6          | 0.056   |
| TAG(54:7)     | 11.9          | 0.016   | 1.1           | 0.411   | 10.4          | 0.045   |

**Table S5.** The differences in the cholesteryl esters (CE) lipidome of LD2 isolated from the livers of rats fed control (C), ethanol (E) or betaine-supplemented ethanol (EB) diet.

| Lipid Species | C vs E        |         | E vs EB       |         | C vs EB       |         |
|---------------|---------------|---------|---------------|---------|---------------|---------|
|               | Fold change ↑ | p-value | Fold change ↓ | p-value | Fold change ↑ | p-value |
| CE(18:2)      | 2.0           | 0.0217  | 1.6           | 0.164   | 1.3           | 0.326   |
| CE(18:1)      | 2.4           | 0.0143  | 1.5           | 0.176   | 1.6           | 0.178   |
| CE(18:0)      | 1.9           | 0.0231  | 1.4           | 0.284   | 1.3           | 0.325   |
| CE(19:0)      | 2.0           | 0.1138  | 5.5           | 0.046   | 0.4           | 0.055   |
| CE(20:3)      | 2.3           | 0.0420  | 1.1           | 0.419   | 2.0           | 0.118   |
| CE(20:2)      | 3.2           | 0.0255  | 1.8           | 0.171   | 1.8           | 0.136   |
| CE(20:1)      | 2.2           | 0.0148  | 0.5           | 0.058   | 1.1           | 0.408   |
| CE(20:0)      | 2.1           | 0.0691  | 0.1           | 0.042   | 0.3           | 0.094   |
| CE(22:5)      | 2.8           | 0.0342  | 1.1           | 0.451   | 3.0           | 0.085   |

**Table S6.** The differences in the phosphatidylinositol (PI) lipidome of LD2 isolated from the livers of rats fed control (C), ethanol (E) or betaine-supplemented ethanol (EB) diet.

| Lipid Species | C vs E           |         | E vs EB      |         | C vs EB       |         |
|---------------|------------------|---------|--------------|---------|---------------|---------|
|               | Fold change<br>↑ | p-value | Fold change↓ | p-value | Fold change ↑ | p-value |
| PI(34:3)      | 1.6              | 0.021   | 1.7          | 0.440   | 0.9           | 0.071   |
| PI(34:2)      | 1.4              | 0.025   | 1.9          | 0.223   | 0.7           | 0.037   |
| PI(34:1)      | 1.4              | 0.004   | 1.9          | 0.218   | 0.8           | 0.031   |
| PI(36:5)      | 1.3              | 0.136   | 1.9          | 0.195   | 0.7           | 0.046   |
| PI(36:3)      | 1.7              | 0.013   | 1.9          | 0.390   | 0.9           | 0.031   |
| PI(36:2)      | 1.9              | 0.001   | 1.9          | 0.482   | 1.0           | 0.035   |
| PI(36:1)      | 1.8              | 0.006   | 1.9          | 0.419   | 0.9           | 0.043   |
| PI(38:4)      | 1.8              | 0.025   | 1.6          | 0.334   | 1.2           | 0.107   |
| PI(38:3)      | 1.8              | 0.055   | 3.1          | 0.105   | 0.6           | 0.018   |
| PI(38:2)      | 1.6              | 0.005   | 2.0          | 0.258   | 0.8           | 0.023   |
| PI(40:8)      | 0.5              | 0.082   | 1.4          | 0.040   | 0.4           | 0.327   |
| PI(40:5)      | 4.6              | 0.003   | 2.6          | 0.155   | 1.7           | 0.012   |
| PI(40:4)      | 1.6              | 0.192   | 5.4          | 0.048   | 0.3           | 0.067   |

**Table S7.** The differences in the phosphatidylserine (PS) and ePS lipidome of LD2 isolated from the livers of rats fed control (C), ethanol (E) or betaine-supplemented ethanol (EB) diet.

| Lipid Species | C vs E        |         | E vs EB      |         | C vs EB       |         |
|---------------|---------------|---------|--------------|---------|---------------|---------|
|               | Fold change ↑ | p-value | Fold change↓ | p-value | Fold change ↑ | p-value |
| PS(34:4)      | 5.7           | 0.049   | 3.1          | 0.071   | 1.9           | 0.249   |
| PS(34:2)      | 2.1           | 0.022   | 1.7          | 0.142   | 1.2           | 0.386   |
| PS(36:4)      | 2.2           | 0.052   | 4.5          | 0.043   | 0.5           | 0.094   |
| PS(36:2)      | 2.3           | 0.017   | 2.7          | 0.021   | 0.9           | 0.415   |
| PS(36:0)      | 7.1           | 0.021   | 49.4         | 0.020   | 0.1           | 0.094   |
| PS(38:0)      | 0.9           | 0.426   | 2.5          | 0.212   | 0.4           | 0.047   |
| PS(40:6)      | 0.2           | 0.013   | 0.3          | 0.160   | 0.6           | 0.237   |
| PS(40:1)      | 2.3           | 0.012   | 2.2          | 0.043   | 1.0           | 0.481   |
| PS(44:5)      | 3.4           | 0.025   | 3.6          | 0.031   | 0.9           | 0.449   |
| PS(44:3)      | 1.7           | 0.015   | 1.4          | 0.194   | 1.2           | 0.358   |
| PS(44:2)      | 2.0           | 0.035   | 1.4          | 0.188   | 1.4           | 0.271   |
| ePS(36:3)     | 1.3           | 0.395   | 4.2          | 0.045   | 0.3           | 0.274   |
| ePS(36:2)     | 2.7           | 0.022   | 2.6          | 0.068   | 1.1           | 0.466   |
| ePS(38:4)     | 4.5           | 0.030   | 5.5          | 0.024   | 0.8           | 0.409   |
| ePS(40:3)     | 1.2           | 0.374   | 4.4          | 0.043   | 0.3           | 0.114   |

**Table S8.** The differences in the phosphatidic acid (PA), Ceramides and cholesteryl esters (CE) lipidome of LD3 isolated from the livers of rats fed control (C), ethanol (E) or betaine-supplemented ethanol (EB) diet.

| Lipid Species   | C vs E        |         | E vs EB      |         | C vs EB       |         |
|-----------------|---------------|---------|--------------|---------|---------------|---------|
|                 | Fold change ↑ | p-value | Fold change↓ | p-value | Fold change ↑ | p-value |
| PA(32:0)        | 4.6           | 0.021   | 3.8          | 0.048   | 1.2           | 0.354   |
| PA(34:4)        | 8.5           | 0.003   | 2.0          | 0.039   | 4.4           | 0.003   |
| PA(34:3)        | 0.0           | 0.074   | 1.9          | 0.280   | 0.0           | 0.001   |
| PA(34:1)        | 5.6           | 0.042   | 3.2          | 0.079   | 1.8           | 0.109   |
| PA(36:5)        | 2.5           | 0.018   | 3.3          | 0.049   | 0.8           | 0.390   |
| PA(36:4)        | 5.9           | 0.029   | 1.9          | 0.167   | 3.2           | 0.039   |
| PA(36:2)        | 16.6          | 0.007   | 5.6          | 0.013   | 3.0           | 0.178   |
| PA(38:6)        | 0.0           | 0.028   | 0.8          | 0.383   | 0.0           | 0.051   |
| PA(38:2)        | 8.5           | 0.044   | 6.5          | 0.078   | 1.3           | 0.337   |
| PA(40:7)        | 2.1           | 0.162   | 3.9          | 0.024   | 0.5           | 0.310   |
| Cer-d18:1(16:0) | 2.4           | 0.016   | 1.6          | 0.205   | 1.5           | 0.287   |
| Cer-d18:1(24:1) | 2.3           | 0.001   | 1.3          | 0.073   | 1.7           | 0.005   |

|                 |      |       |     |       |     |       |
|-----------------|------|-------|-----|-------|-----|-------|
| Cer-d18:1(24:0) | 2.7  | 0.000 | 2.1 | 0.005 | 1.3 | 0.107 |
| CE(16:1)        | 4.1  | 0.001 | 1.0 | 0.421 | 4.2 | 0.000 |
| CE(16:0)        | 4.3  | 0.003 | 1.2 | 0.244 | 3.7 | 0.000 |
| CE(18:3)        | 5.4  | 0.008 | 2.1 | 0.044 | 2.6 | 0.002 |
| CE(18:2)        | 4.3  | 0.019 | 1.7 | 0.134 | 2.5 | 0.004 |
| CE(18:1)        | 5.0  | 0.002 | 1.5 | 0.061 | 3.3 | 0.000 |
| CE(18:0)        | 8.7  | 0.000 | 1.8 | 0.034 | 4.9 | 0.018 |
| CE(20:5)        | 2.7  | 0.103 | 1.1 | 0.410 | 2.3 | 0.023 |
| CE(20:4)        | 2.7  | 0.103 | 1.1 | 0.410 | 2.3 | 0.023 |
| CE(20:3)        | 8.1  | 0.016 | 1.9 | 0.113 | 4.3 | 0.000 |
| CE(20:2)        | 10.4 | 0.010 | 2.6 | 0.053 | 3.9 | 0.000 |
| CE(20:1)        | 7.8  | 0.001 | 2.5 | 0.002 | 3.1 | 0.002 |
| CE(22:6)        | 5.2  | 0.001 | 2.0 | 0.011 | 2.6 | 0.000 |
| CE(22:5)        | 6.0  | 0.005 | 0.8 | 0.264 | 7.4 | 0.002 |
| CE(22:4)        | 17.0 | 0.008 | 2.0 | 0.085 | 8.6 | 0.000 |

**Table S9.** The differences in the phosphatidylcholine (PC) lipidome of LD3 isolated from the livers of rats fed control (C), ethanol (E) or betaine-supplemented ethanol (EB) diet.

| Lipid Species | C vs E           |         | E vs EB      |         | C vs EB          |         |
|---------------|------------------|---------|--------------|---------|------------------|---------|
|               | Fold change<br>↑ | p-value | Fold change↓ | p-value | Fold change<br>↑ | p-value |
| PC(28:1)      | 4.0              | 0.001   | 3.5          | 0.002   | 1.1              | 0.390   |
| PC(30:1)      | 4.0              | 0.001   | 4.2          | 0.002   | 0.9              | 0.453   |
| PC(30:0)      | 3.5              | 0.002   | 2.1          | 0.011   | 1.7              | 0.075   |
| PC(32:2)      | 4.3              | 0.002   | 2.4          | 0.004   | 1.8              | 0.113   |
| PC(32:1)      | 4.0              | 0.002   | 3.5          | 0.006   | 1.1              | 0.353   |
| PC(32:0)      | 2.7              | 0.007   | 2.4          | 0.044   | 1.1              | 0.454   |
| PC(34:2)      | 2.4              | 0.036   | 3.1          | 0.038   | 0.8              | 0.238   |
| PC(34:1)      | 2.9              | 0.002   | 2.7          | 0.008   | 1.1              | 0.425   |
| PC(34:0)      | 2.8              | 0.001   | 5.9          | 0.001   | 0.5              | 0.027   |
| PC(36:3)      | 3.5              | 0.017   | 2.9          | 0.043   | 1.2              | 0.243   |
| PC(36:2)      | 4.5              | 0.014   | 2.8          | 0.043   | 1.6              | 0.030   |
| PC(36:1)      | 4.5              | 0.001   | 2.8          | 0.006   | 1.6              | 0.036   |
| PC(36:0)      | 2.9              | 0.005   | 3.2          | 0.013   | 0.9              | 0.397   |
| PC(38:5)      | 2.3              | 0.017   | 1.9          | 0.068   | 1.2              | 0.255   |
| PC(38:3)      | 3.3              | 0.024   | 2.5          | 0.063   | 1.3              | 0.084   |
| PC(38:2)      | 4.7              | 0.004   | 2.9          | 0.009   | 1.6              | 0.051   |
| PC(38:1)      | 5.2              | 0.003   | 3.0          | 0.014   | 1.8              | 0.019   |
| PC(38:0)      | 5.2              | 0.005   | 3.8          | 0.021   | 1.4              | 0.295   |
| PC(40:8)      | 7.2              | 0.004   | 3.6          | 0.016   | 2.0              | 0.188   |
| PC(40:7)      | 6.0              | 0.010   | 9.6          | 0.028   | 0.6              | 0.351   |
| PC(40:6)      | 3.8              | 0.007   | 3.1          | 0.027   | 1.2              | 0.358   |
| PC(40:5)      | 8.8              | 0.007   | 1.9          | 0.095   | 4.6              | 0.001   |
| PC(40:2)      | 4.8              | 0.005   | 2.4          | 0.021   | 2.0              | 0.180   |
| PC(42:11)     | 19.3             | 0.017   | 2.7          | 0.093   | 7.1              | 0.002   |
| PC(42:10)     | 6.9              | 0.000   | 4.4          | 0.003   | 1.6              | 0.263   |
| PC(42:9)      | 4.0              | 0.005   | 2.7          | 0.009   | 1.5              | 0.205   |
| PC(42:8)      | 4.7              | 0.011   | 2.7          | 0.018   | 1.8              | 0.149   |
| PC(42:7)      | 4.5              | 0.008   | 1.7          | 0.081   | 2.7              | 0.028   |
| PC(44:7)      | 5.7              | 0.050   | 0.0          | 0.027   | 0.0              | 0.135   |
| PC(44:4)      | 4.8              | 0.005   | 9.0          | 0.005   | 0.5              | 0.244   |

**Table S10.** The differences in the phosphatidylinositol (PI) lipidome of LD3 isolated from the livers of rats fed control (C), ethanol (E) or betaine-supplemented ethanol (EB) diet.

| Lipid Species | C vs E        |         | E vs EB       |         | C vs EB       |         |
|---------------|---------------|---------|---------------|---------|---------------|---------|
|               | Fold change ↑ | p-value | Fold change ↓ | p-value | Fold change ↑ | p-value |
| PI(34:3)      | 6.4           | 0.027   | 2.0           | 0.143   | 3.2           | 0.025   |
| PI(34:2)      | 5.5           | 0.006   | 2.1           | 0.051   | 2.6           | 0.044   |
| PI(34:1)      | 5.2           | 0.003   | 2.0           | 0.041   | 2.6           | 0.024   |
| PI(36:5)      | 5.3           | 0.036   | 1.8           | 0.172   | 3.0           | 0.007   |
| PI(36:4)      | 5.5           | 0.018   | 2.3           | 0.077   | 2.4           | 0.005   |
| PI(36:3)      | 5.5           | 0.004   | 1.9           | 0.044   | 2.9           | 0.007   |
| PI(36:2)      | 6.3           | 0.001   | 1.6           | 0.059   | 3.9           | 0.009   |
| PI(36:1)      | 6.5           | 0.000   | 1.9           | 0.007   | 3.5           | 0.002   |
| PI(38:6)      | 7.7           | 0.025   | 2.3           | 0.100   | 3.4           | 0.006   |
| PI(38:5)      | 7.3           | 0.022   | 2.0           | 0.107   | 3.6           | 0.003   |
| PI(38:4)      | 3.4           | 0.042   | 1.5           | 0.186   | 2.2           | 0.021   |
| PI(38:3)      | 5.3           | 0.001   | 2.1           | 0.007   | 2.6           | 0.007   |
| PI(38:2)      | 9.5           | 0.001   | 2.4           | 0.015   | 3.9           | 0.062   |
| PI(38:1)      | 58.6          | 0.009   | 1.8           | 0.224   | 32.9          | 0.117   |
| PI(40:8)      | 5.4           | 0.005   | 1.0           | 0.488   | 5.3           | 0.069   |
| PI(40:7)      | 10.1          | 0.057   | 1.6           | 0.273   | 6.3           | 0.011   |
| PI(40:6)      | 11.8          | 0.016   | 3.3           | 0.053   | 3.6           | 0.083   |
| PI(40:5)      | 21.3          | 0.040   | 1.8           | 0.227   | 11.5          | 0.028   |
| PI(40:4)      | 10.3          | 0.020   | 2.7           | 0.093   | 3.8           | 0.028   |
| PI(40:0)      | 13.7          | 0.070   | 1.4           | 0.350   | 9.8           | 0.047   |

**Table S11.** The differences in the phosphatidylethanolamine (PE) lipidome of LD3 isolated from the livers of rats fed control (C), ethanol (E) or betaine-supplemented ethanol (EB) diet.

| Lipid Species | C vs E        |         | E vs EB       |         | C vs EB       |         |
|---------------|---------------|---------|---------------|---------|---------------|---------|
|               | Fold change ↑ | p-value | Fold change ↓ | p-value | Fold change ↑ | p-value |
| PE(28:1)      | 4.4           | 0.023   | 2.0           | 0.115   | 2.2           | 0.085   |
| PE(28:0)      | 9.1           | 0.002   | 4.7           | 0.008   | 1.9           | 0.218   |
| PE(30:1)      | 4.0           | 0.011   | 21.6          | 0.003   | 0.2           | 0.121   |
| PE(30:0)      | 8.1           | 0.050   | 5.3           | 0.084   | 1.5           | 0.349   |
| PE(32:1)      | 4.6           | 0.046   | 2.1           | 0.153   | 2.2           | 0.087   |
| PE(34:4)      | 2.3           | 0.008   | 2.3           | 0.047   | 1.0           | 0.496   |
| PE(34:2)      | 4.5           | 0.020   | 3.8           | 0.052   | 1.2           | 0.417   |
| PE(34:1)      | 9.4           | 0.001   | 3.4           | 0.006   | 2.7           | 0.055   |
| PE(34:0)      | 3.9           | 0.034   | 1.4           | 0.294   | 2.7           | 0.107   |
| PE(36:3)      | 5.3           | 0.013   | 4.3           | 0.032   | 1.2           | 0.371   |
| PE(36:2)      | 9.4           | 0.010   | 6.8           | 0.022   | 1.4           | 0.339   |
| PE(36:1)      | 6.4           | 0.009   | 3.1           | 0.047   | 2.1           | 0.107   |
| PE(38:2)      | 3.7           | 0.030   | 2.4           | 0.029   | 1.6           | 0.326   |
| PE(38:1)      | 5.1           | 0.013   | 2.3           | 0.032   | 2.2           | 0.033   |
| PE(40:8)      | 6.4           | 0.008   | 3.5           | 0.047   | 1.8           | 0.313   |
| PE(40:5)      | 7.1           | 0.126   | 1.0           | 0.491   | 7.2           | 0.041   |
| PE(40:3)      | 2.2           | 0.023   | 2.1           | 0.032   | 1.0           | 0.477   |
| PE(42:10)     | 5.9           | 0.002   | 1.7           | 0.166   | 3.5           | 0.117   |
| PE(42:9)      | 8.4           | 0.027   | 2.5           | 0.120   | 3.4           | 0.179   |
| PE(42:3)      | 14.4          | 0.069   | 1.2           | 0.397   | 11.7          | 0.036   |
| PE(42:2)      | 0.0           | 0.092   | 0.0           | 0.028   | 2.6           | 0.149   |
| PE(44:11)     | 2.9           | 0.012   | 5.2           | 0.029   | 0.6           | 0.138   |
| PE(44:8)      | 7.2           | 0.011   | 4.1           | 0.059   | 1.8           | 0.232   |
| PE(44:6)      | 46.6          | 0.040   | 9.7           | 0.081   | 4.8           | 0.166   |
| PE(44:5)      | 7.0           | 0.039   | 7.7           | 0.068   | 0.9           | 0.425   |
